# Supplementary material for: Effect of elevated CO2 on phosphorus nutrition of phosphate-deficient Arabidopsis thaliana (L.) Heynh under different nitrogen forms
Source: PubMed Central journal article supplement — J Exp Bot. 2012 Nov 26;64(1):355–67. doi: 10.1093/jxb/ers341 (PMC3528041; doi:10.1093/jxb/ers341), 2012-11-26
Supplement: supp_ers341_jexbot087759_file001.pdf [file supp_ers341_jexbot087759_file001.pdf]

## **Supplementary Material**

**Effect of elevated carbon dioxide on phosphorus nutrition of phosphate-deficient *Arabidopsis thaliana* (L.) Heynh under different nitrogen forms**

**Yaofang Niu, Rushan Chai, Huifen Dong, Huan Wang, Caixian Tang and Yongsong Zhang**

**Fig. S1**

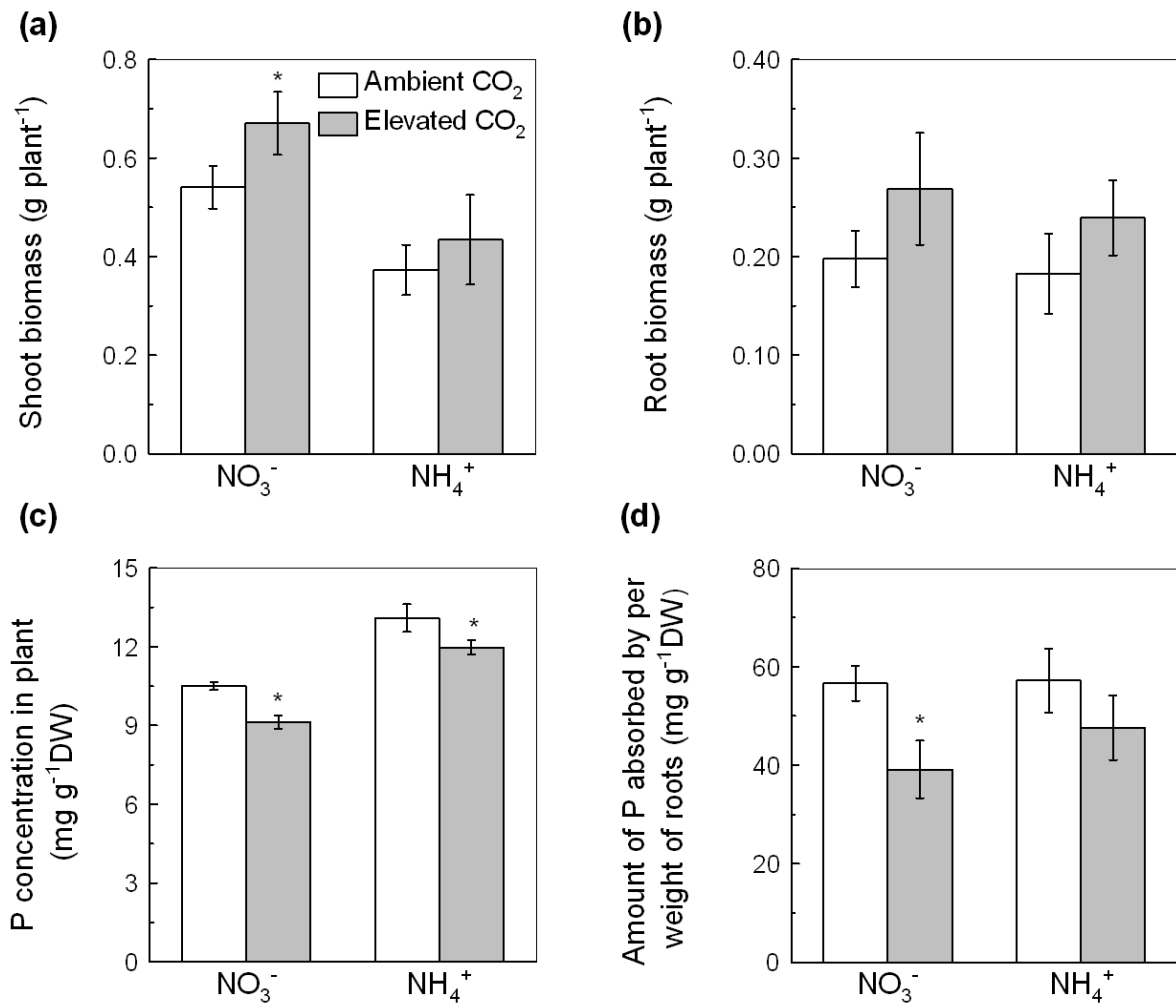

Fig. S1. Effect of elevated CO<sub>2</sub> and N form on fresh weights of shoots (a) and roots (b), P concentration in plants (c) and amount of P absorbed by per unit weight of roots (d) of five-week-old wild-type *Arabidopsis* grown for 7 d in P-adequate (0.5 mM) nutrient solution containing with NO<sub>3</sub><sup>-</sup> or NH<sub>4</sub><sup>+</sup> under ambient CO<sub>2</sub> (350 ± 50 μL L<sup>-1</sup>) or elevated CO<sub>2</sub> (800 ± 50 μL L<sup>-1</sup>). Data are means ± SD (n = 5). Asterisks indicate that the mean values are significantly different between the ambient and elevated CO<sub>2</sub> treatments (*P* < 0.05). DW, dry weight.

**Fig. S2**

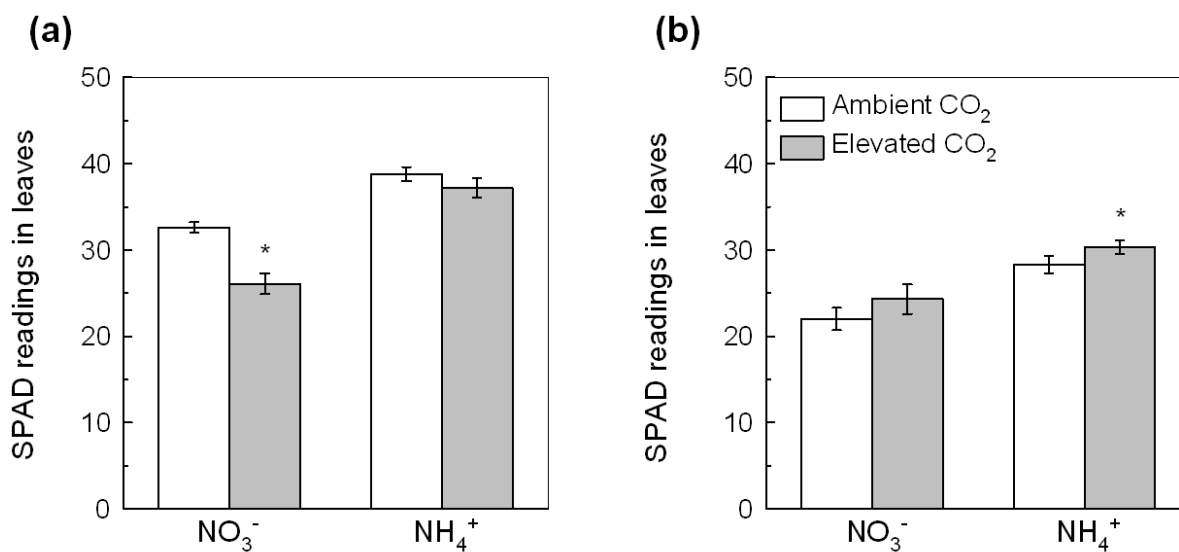

Fig. S2. Concentration of chlorophyll in leaves of five-week-old wild-type *Arabidopsis* grown for 7 d in P-deficient (0.5  $\mu\text{M}$ ) (a) and P-adequate (0.5  $\text{mM}$ ) (b) nutrition solutions containing with  $\text{NO}_3^-$  or  $\text{NH}_4^+$  under ambient  $\text{CO}_2$  ( $350 \pm 50 \mu\text{L L}^{-1}$ ) or elevated  $\text{CO}_2$  ( $800 \pm 50 \mu\text{L L}^{-1}$ ). After 7-d treatment, chlorophyll was measured using the portable chlorophyll meter (SPAD-502, Minolta, Japan) (Netto *et al.* 2005). Data are means  $\pm$  SD ( $n = 5$ ). Asterisks indicate that the mean values are significantly different between the  $\text{CO}_2$  treatments ( $P < 0.05$ ).

**Fig. S3.**

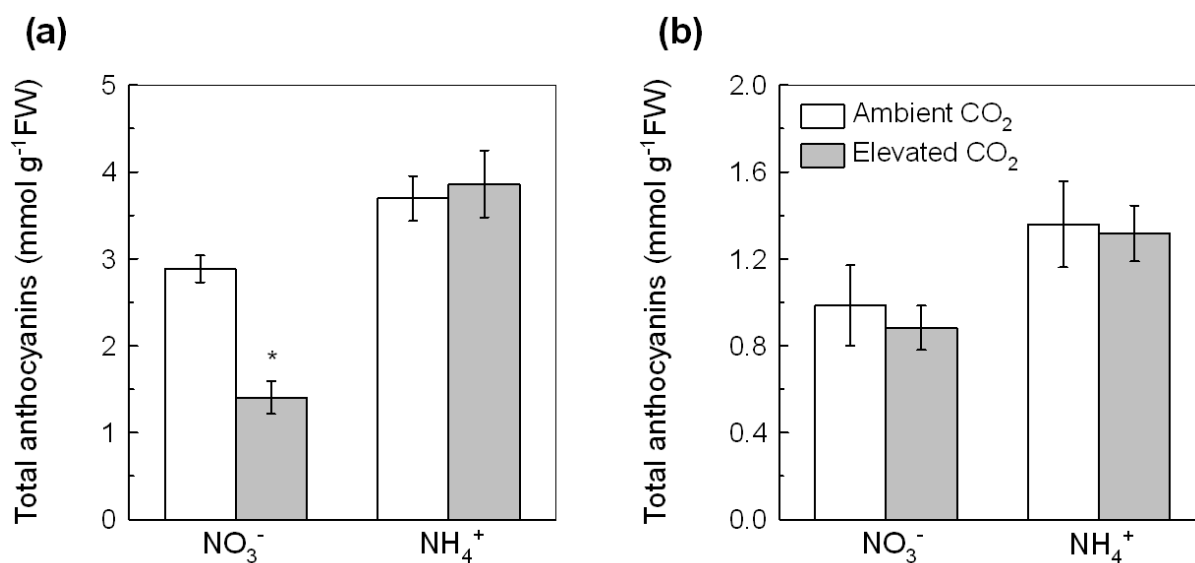

Fig. S3. Concentrations of total anthocyanins in leaves of five-week-old wild-type *Arabidopsis* grown for 7 d in P-deficient (0.5 μM) (a) and P-adequate (0.5 mM) (b) nutrition solutions containing with NO<sub>3</sub><sup>-</sup> or NH<sub>4</sub><sup>+</sup> under ambient CO<sub>2</sub> (350 ± 50 μL L<sup>-1</sup>) or elevated CO<sub>2</sub> (800 ± 50 μL L<sup>-1</sup>). Data are means ± SD ( $n = 5$ ). Asterisks indicate that the mean values are significantly different between the CO<sub>2</sub> treatments ( $P < 0.05$ ). FW, fresh weight.
